# Supplementary material for: Exploring the genomic traits of fungus-feeding bacterial genus Collimonas
Source: PubMed Central journal article supplement (PMC4690342; doi:10.1186/s12864-015-2289-3), 2015-12-24

Figure S1

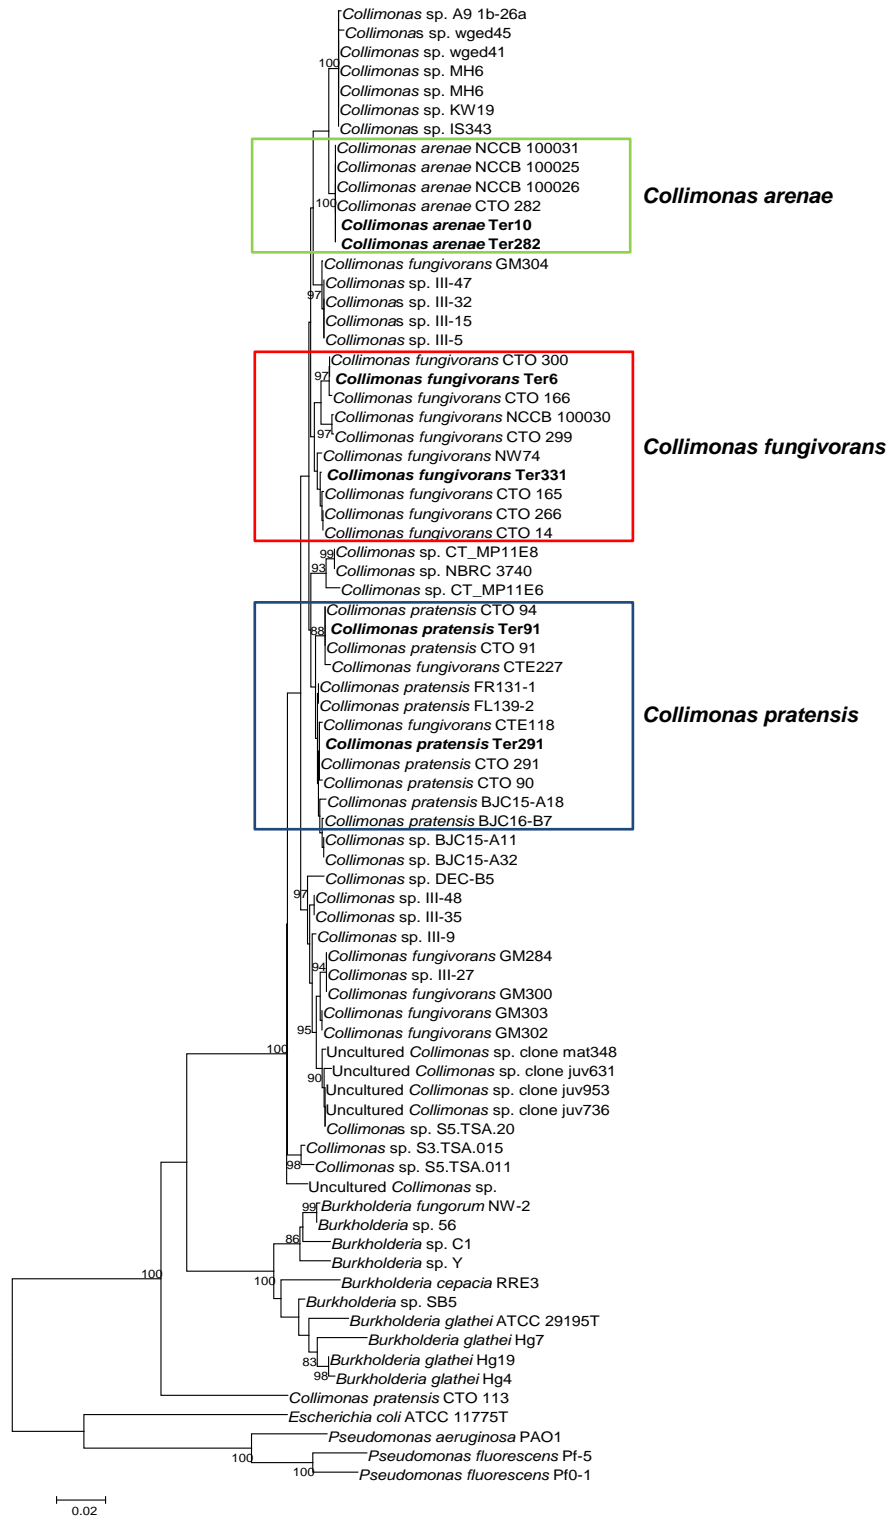

Figure S2

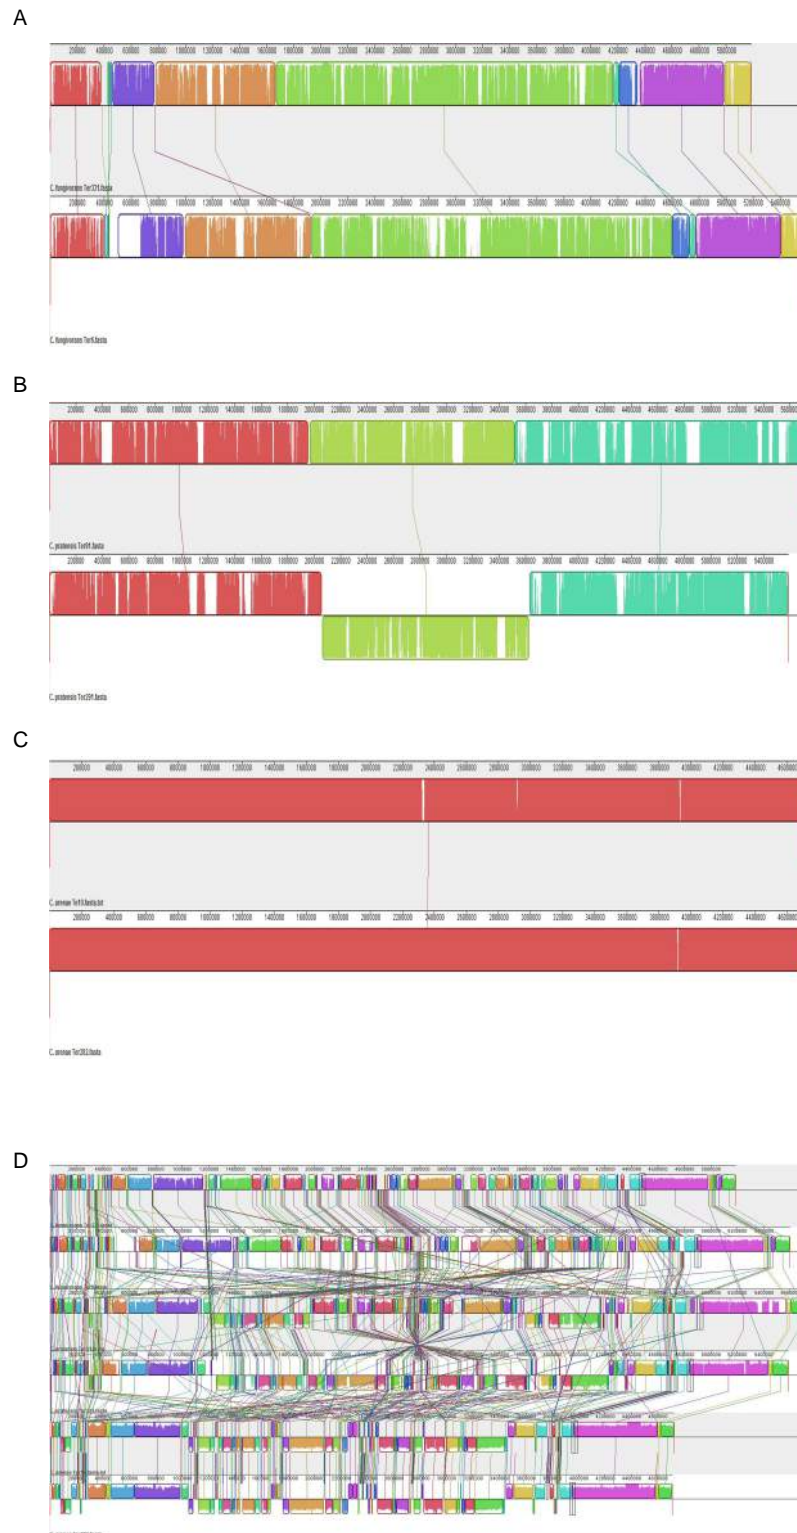

Figure S3

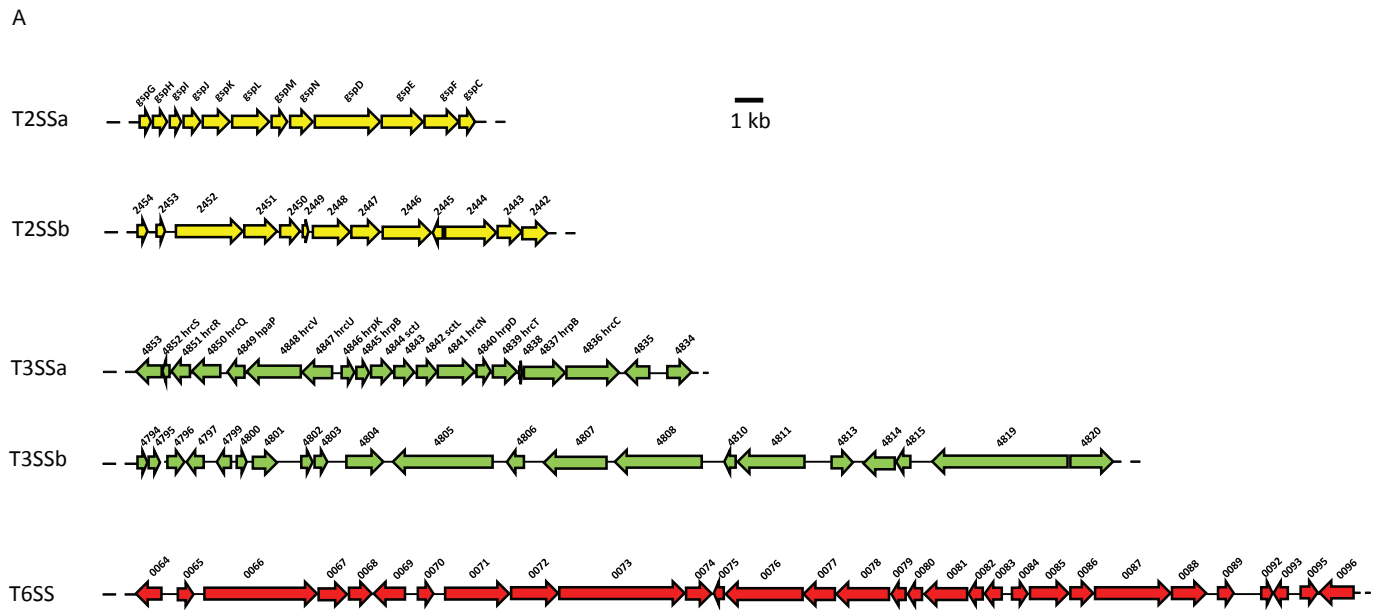

B

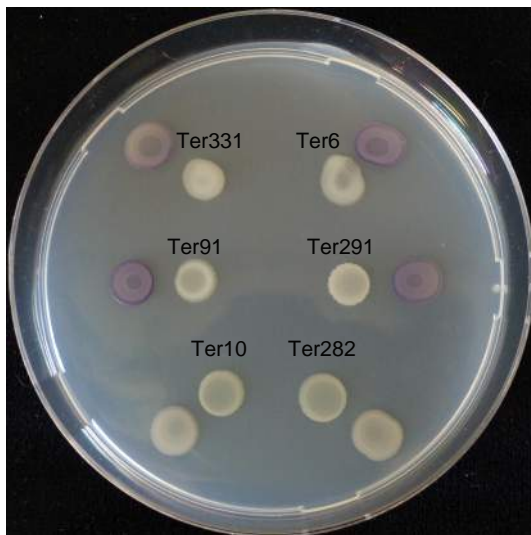

C

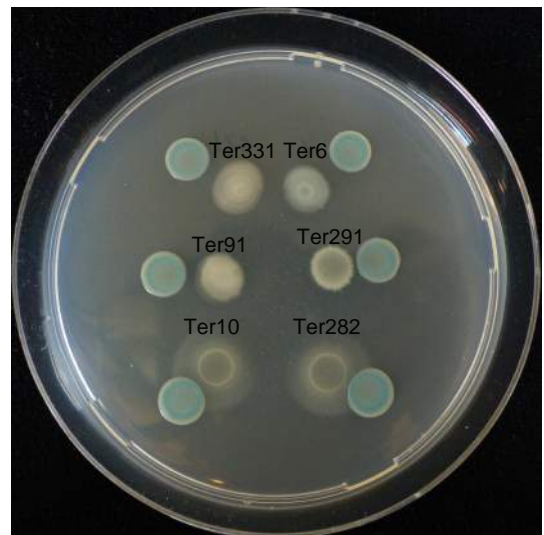

Figure S4

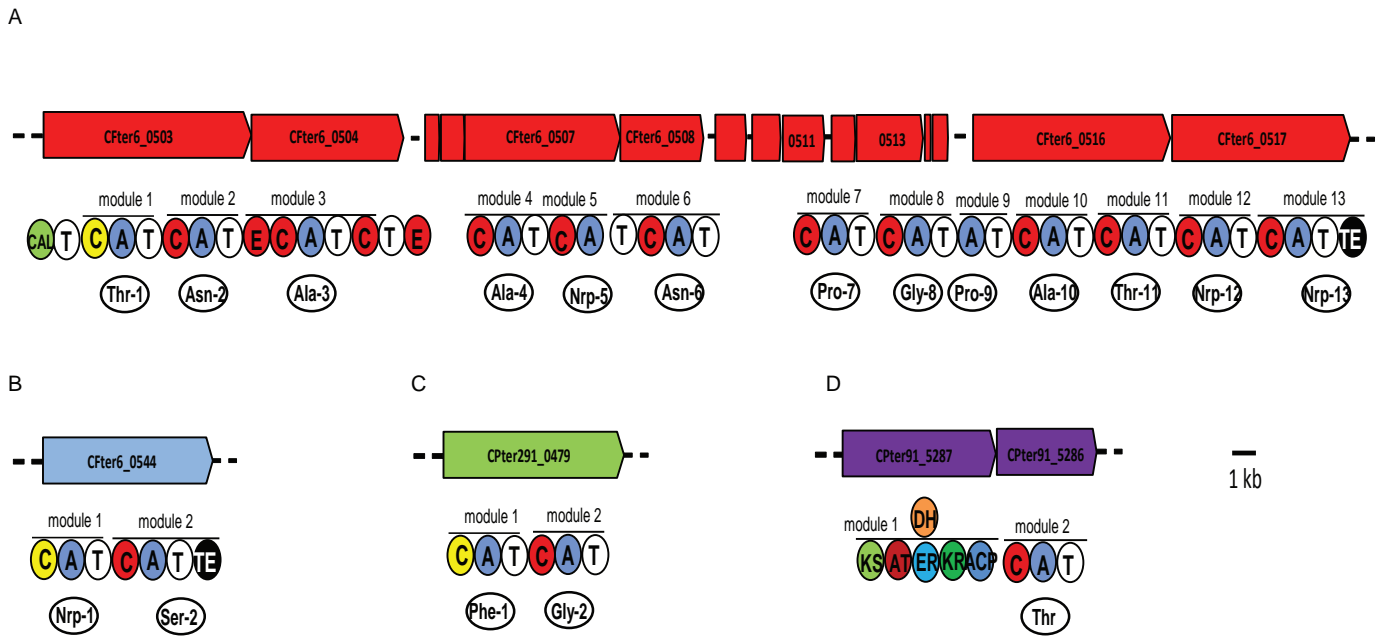

Figure S5

|                     |             |                   |             |             |                   |                                     |
|---------------------|-------------|-------------------|-------------|-------------|-------------------|-------------------------------------|
|                     | 10          | 20                | 30          | 40          | 50                | 60                                  |
| CPter91_2617        | ..... ..... | ..... .....       | ..... ..... | ..... ..... | ..... .....       | ..... .....                         |
| CPter291_2730       | -----       | ---MLTTFERP       | EFVLPFHAHT  | NPHQ-AIAGA  | NARRWLLSTG        | LIGADQLAQA                          |
| Se_pentalenene      | -----       | -----MPQDV        | DFHIPLPGRQ  | SPDH-ARAEA  | EQLAWPRSLG        | LIRSDAAAER                          |
| Sc_geosmin_366AA    | -----       | -MTQQPFQLP        | HFYLPHPARL  | NPHL-DEARA  | HSTTWAREMG        | MLEGSGVWEQ                          |
| Sr_epicubenol       | ----        | MGTTTT            | HKFDRPLRLP  | PLPCFPFSEV  | NPYV-EQVDK        | ETLEWLIDSE                          |
| Sa_avermitilol      | -----       | -----MPQDI        | DFGLPAPAGI  | SPGL-EATRR  | HNLGWVRLG         | LVGDGPSLAW                          |
| Scl_cineole         | -----       | -----MPAGHE       | EFDIPFPSRV  | NPFH-ARAED  | RHVAVMRAMG        | LITGDAAEAT                          |
| Pf_methylenebornane | -----       | MNQSSSARTP        | RSATAPFIVR  | AVRCPPPTRI  | DEALGQEVNE        | RLMEWISNIG                          |
|                     | 70          | 80                | 90          | 100         | 110               | 120                                 |
| CPter91_2617        | ..... ..... | ..... .....       | ..... ..... | ..... ..... | ..... .....       | ..... .....                         |
| CPter291_2730       | G--NER-YDE  | LLAKMYPHAG        | VLE-LEVAIC  | WLTWYFML    | <b>DD</b> FLDK--- | QDIHS-----A                         |
| Se_pentalenene      | H--LRGGYAD  | LASRFYPHAT        | GAD-LDLGVD  | LMSWFFLF    | <b>DD</b> LF      | DGPRGENP                            |
| Sc_geosmin_366AA    | SDLEAHDYGL  | LCAYTHPDCD        | GPA-LSLITD  | WYVWVFFF    | <b>DD</b> HFLE    | EKYKRSQ                             |
| Sr_epicubenol       | Y--RQAKYGW  | LSARTYPYAE        | HHT-LRLVSD  | WCVWLF      | <b>DD</b> AFCE    | SDRRAA                              |
| Sa_avermitilol      | Y--TSWDMPR  | LAACGFPHAR        | GAA-LDLCAD  | AMAFFVVF    | <b>DD</b> QF      | DGPLGRDP                            |
| Scl_cineole         | Y--RRWSPAK  | VGARWFYLAQ        | GED-LDLGCD  | IFGWFFAY    | <b>DD</b> HF      | DGTGTDP                             |
| Pf_methylenebornane | A---SDFGR   | YAMLCHADTN        | NPDRLLLVAQ  | CFAALFAV    | <b>DD</b> HYCD    | DQSLGG                              |
|                     |             |                   |             |             |                   | <b>acidic amino acid-rich motif</b> |
|                     | 130         | 140               | 150         | 160         | 170               | 180                                 |
| CPter91_2617        | ..... ..... | ..... .....       | ..... ..... | ..... ..... | ..... .....       | ..... .....                         |
| CPter291_2730       | RDTVRSITGQ  | IHGDTQARIE        | P---DGMMAI  | LWSALWIRIA  | AAASPRSQR         | FLLAQRDALL                          |
| Se_pentalenene      | KQLTDQVAAA  | LDGPLPDT--        | ----APPIAH  | GFADIWRRTC  | EGMTPAWCAR        | SARHWRNYFD                          |
| Sc_geosmin_366AA    | AGKAHLDRLP  | LFMPLDDAAG        | MPEPRNPVEA  | GLADLWTRTV  | PAMSADWRRR        | FAVATEHLLN                          |
| Sr_epicubenol       | RALPQLYAVL  | EDLDVGSEV-        | ----DDVFAK  | SLLEIKGRIA  | AYGDDEQLDR        | WRNVTKDYLF                          |
| Sa_avermitilol      | ARVCRRLTGI  | VHGAGPGPG-        | ----ADACSA  | AFADVWARST  | DGAHPGWWAR        | TAHEWEYYFA                          |
| Scl_cineole         | AAFVNRTVAM  | LDPRADPTG-        | ----EHPLNI  | AFHDLWQRES  | APMSPLWQRR        | AVDHWYQYLT                          |
| Pf_methylenebornane | FALTAIDPVY  | LPSPFDKELL        | KQQMCDPVIR  | GLLAYMKRVA  | QFCTPSQVAR        | VRQITIAMFV                          |
|                     | 190         | 200               | 210         | 220         | 230               | 240                                 |
| CPter91_2617        | ..... ..... | ..... .....       | ..... ..... | ..... ..... | ..... .....       | ..... .....                         |
| CPter291_2730       | SNLQEIENRM  | ERRIPD-LFS        | FVALRRLSGG  | MRTVFLFNGY  | ADHIELPAAF        | ERHPLHMALS                          |
| Se_pentalenene      | GYVDEAESRF  | WNAPCDSAAQ        | YLAMRRHTIG  | VQPTVDLAER  | AGRFEVPHRV        | FDSAVMSAML                          |
| Sc_geosmin_366AA    | ESMWELSNIN  | EGRVAN-PVE        | YIEMRRKVG   | APWSAGLVEY  | AT-AEVPAAV        | AGTRPLRVLM                          |
| Sr_epicubenol       | AQVWEAANRE  | DEVVPS-LED        | YIFMRRRTGA  | MLTVFALIDV  | ASGRSLSADE        | WRHPGMRAIT                          |
| Sa_avermitilol      | AQAHEAINRL  | RGTPGD-MES        | YLQVRRGIAG  | TDLPLSLGER  | AAGITVPAAA        | FHSPQLRIMR                          |
| Scl_cineole         | AHITEATNRT  | RHTSPT-IAD        | YLELRHRTGF  | MPPLLDLIER  | VWRAEIPAPV        | YTTPEVQTLT                          |
| Pf_methylenebornane | TMAAEGPWRL  | YGTQPT-VAE        | YLASR-QVNS  | FWPCLVLIDL  | IGGYEVPANT        | YSRPDIHHTV                          |
|                     | 250         | 260               | 270         | 280         | 290               | 300                                 |
| CPter91_2617        | ..... ..... | ..... .....       | ..... ..... | ..... ..... | ..... .....       | ..... .....                         |
| CPter291_2730       | DAANDVACIT  | <b>NDILSFDKEA</b> | ANGET-NNYV  | IVVQHMHSGS  | IRQAVDFLHH        | LQAARIEAYL                          |
| Se_pentalenene      | QIAVDVNL    | <b>NDIASLEKEE</b> | ARGEQ-NNMV  | MILRREHGWS  | KRSVSHMQN         | EVRARLEQYL                          |
| Sc_geosmin_366AA    | ETFSDAVHLR  | <b>NDLFSYQREV</b> | EDEGELSNV   | LVLETFFGCT  | TQEAADLVND        | VLTSRLHQFE                          |
| Sr_epicubenol       | ESANDVVVWD  | <b>NDLISYAKES</b> | NSGNSRNNLV  | NVLAEHRHYS  | RQEAMEEIGE        | MRNQAIADMV                          |
| Sa_avermitilol      | EAAIDVTLMC  | <b>NDVYSLEKEE</b> | ARGDM-DNLV  | LVIEHARRCT  | RDEAVTAARG        | EVARRVIRFE                          |
| Scl_cineole         | HTTNQNINIV  | <b>NDVLSLEKEE</b> | AHGDP-HNLV  | LVIQHERQST  | RQQAATARR         | MIDEWTDTFI                          |
| Pf_methylenebornane | ALASLATTLV  | <b>NDLYSAYKEH</b> | LNETGDFKLP  | YLLAARHNCS  | LQEALDLAAD        | IHDAVMEEYE                          |
|                     |             |                   |             |             |                   | <b>NSE triad</b>                    |
|                     | 310         | 320               | 330         | 340         | 350               | 360                                 |
| CPter91_2617        | ..... ..... | ..... .....       | ..... ..... | ..... ..... | ..... .....       | ..... .....                         |
| CPter291_2730       | HAKK-QLPQV  | FRQLHLPPAQ        | QVRAIQYLR-  | GVEDALSGLL  | DWSLQTPRYG        | GTAVAHNRQE                          |
| Se_pentalenene      | LLES-CLPKV  | GEIYQLDTAE        | REALERYRTD  | AVRTVIRGSY  | DWHRSSGRYD        | -AEFALAAGA                          |
| Sc_geosmin_366AA    | HTAFTEVPAV  | ALEKGLTPLE        | VAAVGAYTK-  | GLQDWQSGGH  | EWHRSSRYM         | NKGERPLAGW                          |
| Sr_epicubenol       | AVRP-SLEAL  | G-----            | SDAVLAYVR-  | GLEFWISGSV  | DYSLTSSRYT        | DAWRTARQPS                          |
| Sa_avermitilol      | QLAR-EVPAL  | CAQLGLSAVE        | RAHVDTYLG-  | VMEAWMSGYH  | AWQTQTRRYT        | GAPHVLPSTG                          |
| Scl_cineole         | RTEP-RLPAL  | CGRLGIPLAD        | RTSLYTAVE-  | GMRAAIRGNY  | DWCAETNRYA        | VHRPTGTGRA                          |
| Pf_methylenebornane | RLHATLMKGT  | R-----            | SPVLRRYLT-  | GLSTWIGGNL  | EWHKHSARYH        | I-----                              |

Figure S6

A

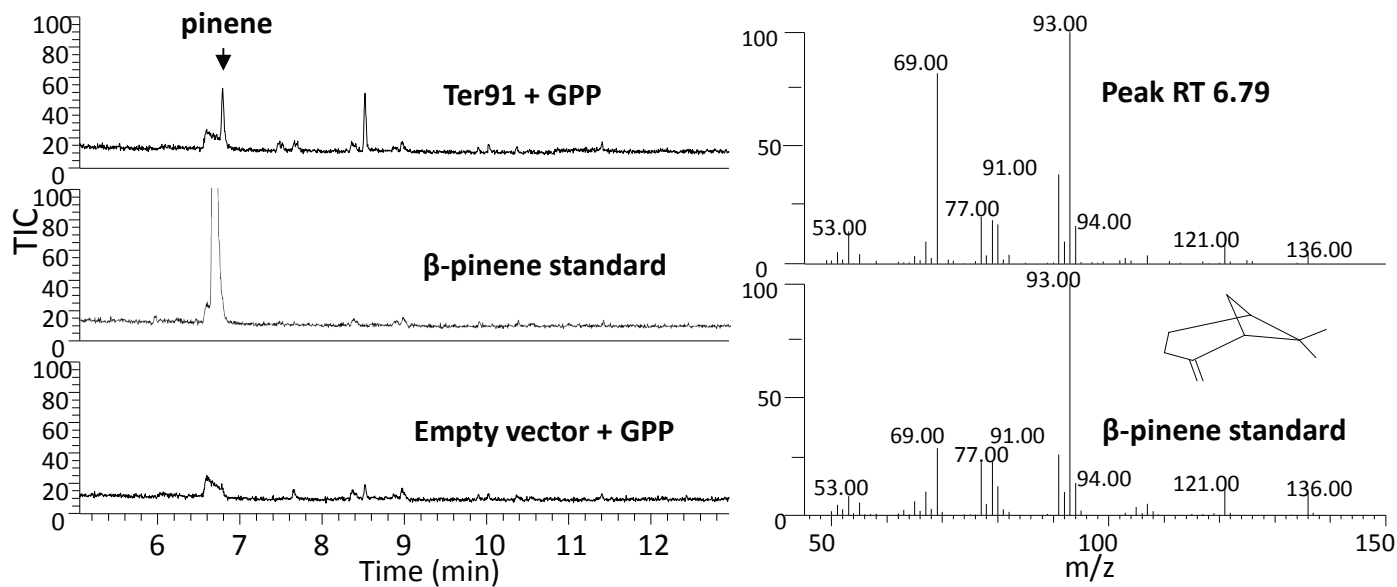

B

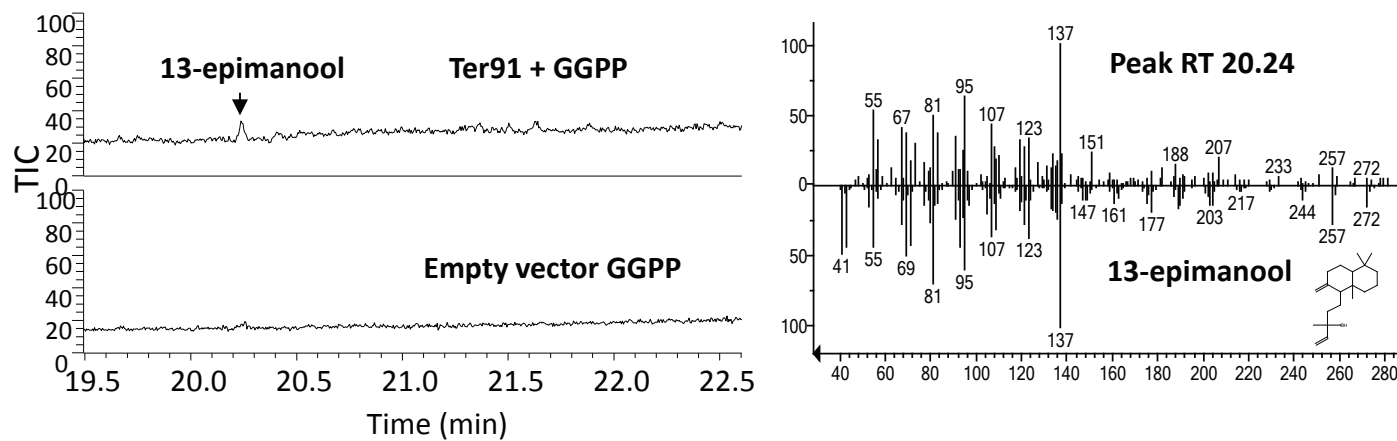

Supplement: 12864_2015_2289_MOESM1_ESM.pdf [file 12864_2015_2289_MOESM1_ESM.pdf]
